# 1 **Human land-use impacts viral diversity and abundance in** 2 **a New Zealand river**

3

4

5 Rebecca French<sup>1</sup>, Justine Charon<sup>1</sup>, Callum Le Lay<sup>1</sup>, Chris Muller<sup>2,3</sup>, Edward C. Holmes<sup>1\*</sup>

6

7

8 <sup>1</sup>Sydney Institute for Infectious Diseases, School of Life and Environmental Sciences and

9 Sydney Medical School, The University of Sydney, Sydney, NSW 2006, Australia.

10 <sup>2</sup>Wildbase, School of Veterinary Sciences, Massey University, Palmerston North 4442, New

11 Zealand.

12 <sup>3</sup>Wildlife and Ecology Group, School of Agriculture and Environment, Massey University,

13 Palmerston North 4442, New Zealand.

14

15 \*Corresponding author:

16 Prof. Edward C. Holmes

17 Sydney Institute for Infectious Diseases, School of Life and Environmental Sciences and

18 Sydney Medical School, The University of Sydney,

19 Sydney, NSW 2006, Australia.

20 Tel: +61 2 9351 5591

21 Email: [edward.holmes@sydney.edu.au](mailto:edward.holmes@sydney.edu.au)

22

23 Total word count = 6,780

## 24 **Abstract**

25 **Although water-borne viruses have important implications for the health of humans**  
26 **and other animals, little is known about the impact of human land-use on viral diversity**  
27 **and evolution in water systems such as rivers. We used metagenomic next-generation**  
28 **sequencing to compare the diversity and abundance of viruses at sampling sites along a**  
29 **single river in New Zealand that differed in human land use impact, ranging from**  
30 **pristine to urban. From this we identified 504 putative virus species, of which 97% were**  
31 **novel. Many of the novel viruses were highly divergent, and likely included a new**  
32 **subfamily within the *Parvoviridae*. We identified at least 63 virus species that may infect**  
33 **vertebrates – most likely fish and water birds – from the *Astroviridae*, *Birnaviridae*,**  
34 ***Parvoviridae* and *Picornaviridae*. No putative human viruses were detected. Importantly,**  
35 **we observed differences in the composition of viral communities at sites impacted by**  
36 **human land-use (farming and urban) compared to native forest sites (pristine). At the**  
37 **viral species level, the urban sites had higher diversity (327 virus species) than the**  
38 **farming (n=150) and pristine sites (n=119), and more viruses were shared between the**  
39 **urban and farming sites (n=76) than between the pristine and farming or urban sites**  
40 **(n=24). The two farming sites had a lower viral abundance across all host types, while**  
41 **the pristine sites had a higher abundance of viruses associated with animals, plants and**  
42 **fungi. We also identified viruses linked to agriculture and human impact at the river**  
43 **sampling sites in farming and urban areas that were not present at the native forest**  
44 **sites. Overall, our study shows that human land-use can impact viral communities in**  
45 **rivers, such that further work is needed to reduce the impact of intensive farming and**  
46 **urbanization on water systems.**

## 47 1. Introduction

48 As viruses likely infect all life forms, and often at high abundance, they can be considered an  
49 integral part of global ecosystems (Zhang et al. 2018; French and Holmes 2020; Sommers et  
50 al. 2021). Until recently, however, there has been a strong bias toward studying viruses in the  
51 context of individual disease-causing pathogens, particularly in humans, domestic animals  
52 and plants (Zhang et al. 2018). Although understandable, such a bias limits our understanding  
53 of their ecology and evolution, how viral abundance and diversity might be shaped by  
54 anthropogenic activities, and their role at the ecosystem scale (French and Holmes 2020;  
55 Sommers et al. 2021). Clearly, a better understanding of these processes will enable virus  
56 evolution and disease emergence to be placed in its true ecological context. As most viruses  
57 do not cause disease in their hosts (Roossinck 2015), characterising non-pathogenic viruses  
58 will greatly expand our understanding of the composition of the global virosphere.

59

60 Metagenomic next-generation sequencing (mNGS) enables the entire virome of a sample to  
61 be characterised in an unbiased manner, giving studies of RNA virus diversity and evolution  
62 a new perspective (Zhang et al. 2018; Wolf et al. 2020; Nayfach et al. 2021). In particular,  
63 mNGS enables the comparison of viral abundance and diversity between groups (animal  
64 populations, environments etc.) that was previously not possible on large scales. To date,  
65 however, most metagenomic studies of viromes have focused on describing viral diversity  
66 without placing it in an appropriate ecological context (Zhang et al. 2018; French and Holmes  
67 2020; Sommers et al. 2021).

68

69 Rivers collect water from the land they flow through. As such, their microbial community  
70 necessarily reflects the ecological properties of this adjacent land (Van Rossum et al. 2015).

71 Run-off from farmland, urban areas and sewage discharge directly introduce human and  
72 livestock-infecting microbes into rivers, sometimes causing water-borne disease (Ferguson et  
73 al. 2003; Alegbeleye and Sant’Ana 2020). For bacteria, it is well understood that human  
74 activity on land impacts the environment within rivers, in turn affecting bacterial abundance  
75 and diversity (Van Rossum et al. 2015; Chen et al. 2018; Phiri et al. 2020; Qiu et al. 2020).  
76 However, even though some water-borne viruses have important implications for human  
77 health, such as enteroviruses (Amvrosieva et al. 2001), hepatitis E virus (Sedyaningsih-  
78 Mamahit et al. 2002; Martolia et al. 2009) and norovirus (Jack et al. 2013; Sekwadi et al.  
79 2018), we know little about how human land-use impacts viral abundance and diversity in  
80 rivers. A study of an agricultural river basin in Ontario, Canada, found that higher levels of  
81 human viruses and coliphages were associated with greater upstream human land  
82 development (Jones et al. 2017). Similarly, land use in Singapore was the main driver of viral  
83 community structure in reservoirs used for potable water supplies and recreational activities  
84 (Gu et al. 2018). However, because such comparisons involved different catchments that are  
85 likely to have contrasting viral communities, it may not be possible to isolate the effect of  
86 human activity on viral ecology. To date there has been no study directly comparing the viral  
87 ecology of river water flowing through different land-use types within the same river  
88 catchment.

89

90 New Zealand freshwater communities have been isolated since New Zealand split from  
91 Gondwanaland approximately eighty million years ago (Mortimer et al. 2019). Freshwater  
92 communities within New Zealand are also generally isolated from each other, with little  
93 opportunity for non-migratory species to colonize new water catchments (Burridge and  
94 Waters 2020). This is reflected in the evolution of freshwater plant, vertebrate and  
95 invertebrate species. For example, there are high levels of endemism within New Zealand

96 non-migratory galaxiid fish, with many species are found only in one water catchment (Dunn  
97 et al. 2018; Burridge and Waters 2020). It might therefore be expected that the freshwater  
98 communities of New Zealand would similarly contain many highly divergent viruses and  
99 locally unique viruses that have co-evolved with their isolated hosts. In contrast, human  
100 activity has had a large impact on New Zealand freshwater communities, including run-off  
101 from intensive agriculture and urbanization and the introduction of invasive species such as  
102 rainbow trout (*Oncorhynchus mykiss*). It is likely that these changes would also have affected  
103 the viral community in the rivers, introducing viruses associated with plants and animals  
104 grown for food, as well as viruses that infect humans.

105

106 Very little is known about the viral ecology of New Zealand rivers, with research generally  
107 limited to targeted testing for known pathogens. Two river sites – the Waikato River in the  
108 North Island and the Oreti River in the South Island – that supply drinking water to urban  
109 populations have been screened for enteric viruses, with positive results in 97% of samples  
110 (Williamson et al. 2011). In the Manawatū region, the Manawatū and Pohangina rivers and  
111 Turitea creek have been screened for plant viruses, with three tombusviruses detected  
112 (Mukherjee 2011; Mukherjee et al. 2012). New variants of Tobacco mosaic virus and Tomato  
113 mosaic virus were also identified (Mukherjee 2011), and human polyomaviruses have been  
114 found in the Matai river in Nelson (Kirs et al. 2011). *Sclerotinia sclerotiorum* Hypovirulence-  
115 Associated Virus-1 (which infects a fungus often found in agricultural plants) was detected in  
116 a Christchurch river using metagenomic sequencing of DNA from sediment samples  
117 (Kraberger et al. 2013). To our knowledge, viral meta-transcriptomics has not yet been  
118 performed on a river system in New Zealand.

119

120 The core aim of this study was to compare the viral (particularly RNA virus) abundance and  
121 diversity between sites with differing human land use impact in a New Zealand river  
122 catchment and from this determine how virome ecology and evolution are shaped by human  
123 activity. Accordingly, six sites on the Manawatū River, North Island, were selected based on  
124 their differing land use types. Two sites were at the edge of the Ruahine forest park,  
125 containing water that has only flowed through pristine native forest (pristine sites, denoted P1  
126 and P2). Two sites contain water that has flowed through farmland (farmland sites, at least 25  
127 km for F1 and 50 km for F2). The final two sites have flowed first through pristine native  
128 forest, then farmland and finally urbanized areas (urban sites) – Feilding and Palmerston  
129 North (named U1 and U2, respectively). Water samples were taken at these sites and  
130 subjected to total RNA sequencing (i.e., meta-transcriptomics).

131

## 132 **2. Methods**

### 133 **2.1 The Manawatū River**

134 The Manawatū River is a 180 km river located in the North Island of New Zealand (Figure  
135 1). Importantly, it flows through three very different land-use types, allowing a direct  
136 comparison between them. The river begins in the Ruahine forest park that encompasses the  
137 Ruahine mountain range (Department of Conservation 2021b). The park is dominated by  
138 native vegetation, including podocarp forest at lower altitudes and sub-alpine shrubland and  
139 tussock grasslands at higher altitudes. Between the 1800s and 1970s there was considerable  
140 forest clearing and logging, but since 1976 the area has been protected as a forest park with  
141 no farming or logging (Department of Conservation 2021a). There is little to no human  
142 habitation or activity in these ranges, with the exception of recreational hikers, hunters and  
143 rangers. A variety of endemic New Zealand animals inhabit these ranges, including parrots

144 (kakāriki *Cyanoramphus novaezelandiae*, kaka *Nestor meridionalis*), ducks (who  
145 *Hymenolaimus malacorhynchos*), New Zealand long-tailed bats (*Chalinolobus tuberculatus*)  
146 and large carnivorous land snails (*Powelliphanta marchanti*). Introduced pest species are also  
147 found there, including red deer (*Cervus elaphus*), feral pigs (*Sus scrofa*) and goats (*Capra*  
148 *hircus*), brush tailed possums (*Trichosurus vulpecula*), stoats (*Mustela erminea*) and rainbow  
149 trout (*Oncorhynchus mykiss*) (Department of Conservation 2021b).

150

151 After flowing through the Ruahine Forest Park, the river passes through intensively farmed  
152 areas, primarily consisting of sheep, beef and dairy farming. This land use is known to impact  
153 the river, with the Manawatū region having among the highest nitrogen and phosphorus  
154 concentrations (nutrients associated with pastoral agriculture) in New Zealand (Roygard et al.  
155 2012). It then flows through two urban centres: Feilding (town, population 17,050), and  
156 Palmerston North (city, population 81,500), before flowing out into the Tasman Sea. Both  
157 these urban centres discharge treated wastewater into the Manawatū River, and in some years  
158 this negatively impacts aquatic life through discharge of nutrients and a corresponding  
159 increase in periphyton cover (Hamill 2012).

160

## 161 **2.2 Sample collection**

162 Two-litre (L) water samples were collected at each of the six sites in the Manawatū River  
163 catchment (Figure 1). For consistency, all samples were collected on the same day (13<sup>th</sup> July  
164 2019). At each site, 1 L was collected from the water's edge and 1 L was collected 1.2 metres  
165 from the bank in the main flow of the river using a sampling pole, with the aim of obtaining a  
166 representative sample of the river water. In the case of P2, which was less than 1.2 metres  
167 wide, the second sample was taken by hand in the main flow of the river. These samples were

168 combined to obtain 2 L of water per site and 12 L in total. Once collected, the water samples  
169 were kept at approximately 4°C using icepacks until processing.

170

171 At each site, a separate 250 ml sample was collected from the main flow of the river to  
172 measure additional variables (temperature, salinity, conductivity, pH, total dissolved solids,  
173 turbidity). These were measured using a multiparameter tester (Waterproof PCSTestr 35,  
174 Thermo Scientific) and a Turbidimetre (2100P Turbidimetre, Hach). Temperature was  
175 measured on-site and the remaining variables were measured in the laboratory.

176

### 177 **2.3 Sample processing and sequencing**

178 Filtering of all samples was completed within thirty hours of sample collection. Samples with  
179 a large amount of silt (farming and urban sites) were first filtered through a glass fibre filter,  
180 of 47 mm diameter and 0.7 µm pore size (Microscience). All samples were then filtered  
181 through polyether sulphone (PES) membrane filters, of 47mm diameter and 0.2µm pore size  
182 (Microscience).

183

184 Samples were concentrated from 2 L to ~100 µL in two steps using tangential ultra-filtration  
185 and ultra-centrifugation. The samples were first concentrated from 2 L down to 40 mL using  
186 the vivaflow 200 (Sartorius). The samples were then concentrated from 40 mL to ~2 mL  
187 using vivaspin 20 ultrafiltration units (Sartorius), and further concentrated to ~100 µL using  
188 vivaspin 2 ultrafiltration units (Sartorius). All units had polyether sulphone filters with a  
189 molecular weight cut-off of 10 kDa. Samples were stored at -80°C until nucleic acid  
190 extraction.

191



192 RNA and DNA were extracted from the concentrated water samples using the AllPrep®  
193 PowerViral® DNA/RNA Kit. DNA was removed by DNase digestion (Qiagen RNase-Free  
194 DNase I Set), then in the same column the RNA was concentrated to 15 µL using the MN  
195 NucleoSpin RNA Clean-up XS (Macherey-Nagel). The same process was conducted on 2 x  
196 200 µL of sterile water to create two blank control libraries. cDNA libraries were prepared  
197 using the SMARTer® Universal Low Input RNA Kit for Sequencing (Takara Bio), without  
198 rRNA depletion. Libraries were sequenced on the Illumina Novaseq platform (150bp, paired  
199 end sequencing). The corresponding sequencing data have been deposited in the Sequence  
200 Read Archive (SRA) under accession numbers SRR17234948-53. The trimmed alignment  
201 fasta files used to infer the phylogenetic trees are available at  
202 <https://github.com/RKFrench/Viral-Diversity-NZ-River>.

203

#### 204 **2.4 Quality control, assembly and virus identification**

205 TruSeq3 adapters were trimmed using Trimmomatic (0.38) (Bolger et al. 2014). Bases below  
206 a quality score of five were trimmed with a sliding window approach (window size of four).  
207 Bases at the beginning and end of the reads were similarly excluded if below a quality of  
208 three. SMART adapters were trimmed using bbdduk in BBtools (bbmap 37.98) (Bushnell  
209 2018). Sequences below an average quality of ten were removed.

210

211 Sequence reads were assembled *de novo* using Trinity (2.5.1) (Grabherr et al. 2011), with a  
212 kmer size of 32 and a minimum contig length of 300. BLASTN (BLAST+ 2.9.0) and  
213 Diamond BLASTX (Diamond 0.9.32) were used to identify viruses by comparing the  
214 assembled contigs to the NCBI nucleotide database (nt) and non-redundant protein database  
215 (nr) (Camacho et al. 2009; Buchfink et al. 2021). Contigs with hits to viruses were retained.

216 To avoid false-positives, sequence similarity cut-off values of 1E-5 and 1E-10 e-value were  
217 used for the nt and nr databases, respectively. Virus abundances were estimated using RSEM  
218 (1.3.0), allowing us to determine the expected count according to the Expectation-  
219 Maximization algorithm for each contig (Li and Dewey 2011). This was expressed as the  
220 percentage of the total number of reads in each library. Eukaryotic and prokaryotic diversity  
221 was characterized using CCMetagen (v 1.2.4) and the NCBI nucleotide database (nt)  
222 (Clausen et al. 2018; Marcelino et al. 2020).

223

## 224 **2.5 Evolutionary and ecological analysis**

225 Using the nucleotide sequences identified as viral replication proteins (i.e., as identified by  
226 BLAST), the getorf program from EMBOSS (6.6.0) was used to find and extract open  
227 reading frames and translate them into amino acid sequences using the standard genetic code  
228 with a minimum size of 100 amino acids (Rice et al. 2000). Amino acid sequences were  
229 aligned using the E-INS-i algorithm in MAFFT (7.402) (Katoh and Standley 2013) and  
230 trimmed using Trimal, (1.4.1) (Capella-Gutiérrez et al. 2009) with a gap threshold of 0.9 and  
231 at least 20% of the sequence conserved. See Supplementary Table S1 for more details.  
232 Maximum likelihood phylogenetic trees for each virus family were then estimated using IQ-  
233 TREE (1.6.12) (Nguyen et al. 2015), with the best fit substitution model determined by the  
234 program and employing 1000 bootstrap replications to assess node robustness. Any  
235 sequences with >95% amino acid similarity to each other or known species were assumed to  
236 represent the same virus species, with only one representative of each then included in the  
237 phylogenetic analysis. All novel viruses identified were given names that include the word  
238 ‘flumine’ (Latin for ‘of the river’) to convey where the virus was found.

239

240 APE (5.4) and ggtree (2.4.1) were used to visualize the phylogenetic trees and produce  
241 figures (Paradis and Schliep 2019; Yu 2020). Alpha diversity (i.e., diversity within each  
242 sample) was analysed using richness (number of viral families), Shannon index and the  
243 Shannon effective number of species (ENS). The Shannon index reflects the number of taxa  
244 and the evenness of the taxa abundances. The Shannon ENS is the effective number of taxa  
245 present in the community if the abundances were equal (Hill 1973). The beta diversity (i.e.,  
246 diversity across land-use types) was analysed using a principal co-ordinate analysis with  
247 a Bray–Curtis dissimilarity matrix, presented as an ordination plot. Alpha and Beta diversity  
248 analyses were conducted using Phyloseq (v1.34.0) in R (v 4.0.5) (McMurdie and Holmes  
249 2013; R Core Team 2021). Other graphs were generated using ggplot2 (Wickham 2016) and  
250 venneuler (Wilkinson 2011).

251

## 252 **2.6 Identifying possible reagent contamination**

253 Any virus found in the blank negative control libraries (i.e., a sterile water and reagent mix)  
254 was assumed to have resulted from contamination likely associated with laboratory reagents.  
255 Accordingly, these viruses were removed from the river sample libraries and excluded from  
256 all analyses. Additionally, any viruses that fell into the same clades as those found in blank  
257 libraries were conservatively assumed to be contaminants (Porter et al. 2021) and similarly  
258 removed. These included six circo-like viruses in the *Circoviridae* (single-strand DNA  
259 viruses) and 19 tombus-like viruses from the *Tombusviridae* (single-strand, positive-sense  
260 RNA viruses).

261

## 262 **3. Results**

263 We characterized the RNA viromes from six Manawatū River water samples using total RNA  
264 sequencing.

265

### 266 **3.1 Water measurements**

267 Our water measurements indicated that the two pristine sites had a different abiotic  
268 environment from the farming and urban sites, while the farming and urban sites were similar  
269 to each other (Figure 2). Specifically, the pristine sites had lower salinity, pH, total dissolved  
270 solids, turbidity, conductivity and temperature than the farming and urban sites. The farming  
271 and urban sites also had a larger variation between sites, with the exception of pH and  
272 temperature.

273

### 274 **3.2 Virus identification**

275 The six sequencing libraries generated had an average of 90 million reads per library, and on  
276 average 0.7% of these were derived from viruses. This is within the usual range found in  
277 faecal samples, cloacal swabs and invertebrate tissue, but higher than commonly observed in  
278 vertebrates (Zhang et al. 2018; Campbell et al. 2020; Le Lay et al. 2020; Mahar et al. 2020;  
279 Wille et al. 2020; Wille et al. 2021) in studies using similar metagenomic techniques.  
280 However, it was lower than observed in urban streams in Ecuador (Guerrero-Latorre et al.  
281 2018). P2 and U2 had the highest number of reads and the highest number of viral reads  
282 (Figure 3). Notably, the two pristine sites had the highest percentage of viral reads, at 1.31  
283 and 1.35%. F1, F2 and U1 all had lower total reads, total viral reads and percentage viral  
284 reads. Analysis of eukaryotic and prokaryotic diversity showed that all samples primarily

285 consisted of bacteria (accounting for 71-86% of assembled contigs) followed by eukaryotes  
286 (5-19%).

287

288 In total, we identified 504 putative virus species from 27 viral families, of which 491 (97%)  
289 were novel using a cut-off of 95% amino acid similarity, primarily in replication-associated  
290 proteins (although these await formal verification by the International Committee on  
291 Taxonomy of Viruses). These included multiple members of the *Nodaviridae* (n=74 novel  
292 viruses), *Tombusviridae* (n=64) and *Dicistroviridae* (n=61). If a more conservative <90%  
293 amino acid sequence similarity is used to define a novel virus species, then the samples  
294 analysed here contain 470 novel viruses. We also detected previously described viruses (i.e.,  
295 with more than 95% amino acid similarity to viruses detected previously), including  
296 *Sclerotinia sclerotiorum* hypovirulence associated DNA virus 1 (*Genomoviridae*), White  
297 clover mosaic virus (*Alphaflexiviridae*), Rhopalosiphum padi virus (*Dicistroviridae*), Norway  
298 luteo-like virus 4 (*Luteoviridae*), Carnation Italian ringspot virus (*Tombusviridae*) and Pepper  
299 mild mottle virus (*Virgaviridae*). Importantly, we identified at least 63 virus species from the  
300 *Astroviridae*, *Birnaviridae*, *Parvoviridae* and *Picornaviridae* that may infect vertebrates. No  
301 likely human viruses were detected. Below we describe, in more detail, those families with  
302 high virus diversity in our study and those containing viruses that may infect vertebrates.

303

### 304 **3.3 High Phylogenetic Diversity Families**

#### 305 *3.3.1 Tombusviridae*

306 We identified a high diversity and abundance of novel *Tombusviridae*, a family of single-  
307 strand positive-sense RNA viruses that infect plants (Sit and Lommel 2015). Of the viruses  
308 identified 18 fell into the subfamily *Procedovirinae*, found in all land-use types. Of these, one

309 virus in U2 clustered within the genus *Betacarmovirus* and was most closely related to  
310 Cardamine chlorotic fleck virus (Skotnicki *et al.* 1993), although with only 45% amino acid  
311 similarity. Another, found in U2 and F2, belonged to the genus *Gammacarmovirus* and is  
312 most closely related to Melon necrotic spot virus with 71-73% amino acid similarity (Riviere  
313 and Rochon 1990). We also found Carnation Italian Ringspot virus (genus *Tombusvirus*) at  
314 both farming sites, with 98-99% amino acid similarity. The *Procedovirinae* also contain a  
315 clade of closely related novel tombus-like viruses that appear basal to any currently described  
316 genera and were found at the pristine sites. Another clade was found in the urban and farming  
317 sites and appears to fall within the subfamily *Regressovirinae*.

318

### 319 3.3.2 *Dicistroviridae*

320 We similarly found a high diversity of viruses belonging to the *Dicistroviridae*, a family of  
321 single-strand positive-sense RNA viruses commonly associated with arthropods (Valles *et al.*  
322 2017). Thirty-nine viruses were part of a highly divergent clade that fell basal to the three  
323 currently recognized genera, to which it exhibited less than 50% amino acid similarity. There  
324 were also 15 newly identified viruses that fell into the genus *Cripavirus* found across all the  
325 land-use types. In addition, we detected two previously described cripaviruses -  
326 *Rhopalosiphum padi* virus (97-100% amino acid similarity) and Cricket paralysis virus (96-  
327 97%), both only at the urban site U2.

328

### 329 3.3.3 *Nodaviridae*

330 We identified 13 novel viruses from the genus *Alphanodavirus* of the *Nodaviridae* (single-  
331 strand positive-sense RNA viruses). This included Black beetle virus (*Alphanodavirus*; 95-  
332 98% amino acid similarity) in all farming and urban sites, but not at the pristine sites.

333 Although we did not find any viruses belonging to the genus *Betanodavirus*, the only other  
334 genus of *Nodaviridae*, we did identify 61 other novel viruses from a divergent clade that fell  
335 outside of the *Alphanodavirus* and *Betanodavirus* genera. Many of these were most closely  
336 related to Barns Ness serrated wrack noda-like virus 2 isolated from marine algae (Waldron  
337 et al. 2018), although with less than 50% amino acid similarity.

338

### 339 **3.4 Vertebrate-infecting families**

#### 340 *3.4.1 Astroviridae*

341 The *Astroviridae* are a family of single-stranded positive-sense RNA viruses that infect  
342 mammals and birds (Lukashov and Goudsmit 2002). We identified 28 novel astroviruses,  
343 including three new species within the *Bastrovirus* clade that were found in the farming and  
344 urban sites (Figure 4). These three viruses were most closely related to a bastrovirus found in  
345 sewage in Brazil (Dos Anjos et al. 2017), although with only 57-67% amino acid similarity.  
346 Twenty-four novel viruses fell into a divergent clade outside of the genus *Avastrovirus* and  
347 the *Bastrovirus* clade: these were most closely related to ‘*Astroviridae* sp.’ viruses found in  
348 metagenomic studies of grassland soil in California, USA (Starr et al. 2019). The viruses  
349 found on our study that fell into this clade (denoted Flumine astrovirus 1-24) all had less than  
350 62% amino acid similarity with the soil viruses. Notably, they were found across all our river  
351 sites, with a higher diversity at the farming and urban sites (n=11 and 21 species,  
352 respectively) than the pristine sites (n=4). However, flumine astrovirus 3 found at a pristine  
353 site had the highest abundance, representing 0.04% of the total reads in the library.

354

355 3.4.2 *Birnaviridae*

356 The *Birnaviridae* are a family of double-stranded RNA viruses that infect fish, birds and  
357 insects. We identified one virus from this family at a pristine site (P1), that was most closely  
358 related (although with only 30% amino acid similarity) to blotched snakehead virus (Da  
359 Costa et al. 2003) and Lates calcarifer birnavirus (Chen et al. 2019), both of which are  
360 associated with fish.

361

362 3.4.3 *Parvoviridae*

363 The *Parvoviridae* are a family of small double-stranded DNA viruses that infect both  
364 vertebrates and invertebrates. We identified 21 parvoviruses: all were present at the Feilding  
365 urban site (U1), with one (Flumine parvovirus 17) found at both P1 and U1. Most (n=18) of  
366 these viruses fell into a distinct clade, separate from other previously described subfamily and  
367 genera (Figure 5). This clade had less than 18% amino acid similarity with other  
368 parvoviruses, but up to 81% similarity (average of 41%) with each other. A new subfamily  
369 *Hamaparvovirinae* was created in 2020 that exhibits less than 20% amino acid sequence  
370 identity with other parvoviruses (Pénzes et al. 2020). This is comparable to the level of  
371 sequence similarity observed in the novel clade identified here, indicating this may also  
372 represent a new subfamily that we have tentatively called the *Flumenparvovirinae*. The  
373 remaining three viruses fell into the subfamily *Densovirinae*. These viruses most likely infect  
374 invertebrates as they were most closely related to *Planococcus citri* densovirus (Thao et al.  
375 2001) (76% amino acid identity) and *Blattella germanica* densovirus (Kapelinskaya et al.  
376 2011) (55-61%) that infect mealy bugs and cockroaches, respectively.

377



378 3.4.4 *Picornaviridae*

379 The *Picornaviridae* are a large family of single-stranded RNA viruses that infect both  
380 vertebrates and invertebrates. We identified 15 novel picornaviruses, most (n=11) from the  
381 urban sites, although they were also identified at both farming and pristine sites. The pristine  
382 sites had the lowest diversity of picornaviruses (n=2), but the highest abundance. Eight of the  
383 picornaviruses fell into a clade with fur seal picorna-like virus (Krumbholz et al. 2017) and  
384 Ampivirus A1 associated with the smooth newt *Lissotriton vulgaris* (Reuter et al. 2015). This  
385 clade is most closely related to a cluster of genera *Tremovirus*, *Harkavirus* and *Hepatovirus*  
386 found in birds and mammals.

387

388 3.4.5 *Genomoviridae*

389 The *Genomoviridae* are a family of single-stranded DNA viruses. Although they are  
390 commonly associated with fungi, they have also identified them in mammals and birds  
391 (Varsani and Krupovic 2021). With the exception of one virus species (Flumine genomovirus  
392 1), members of the *Genomoviridae* were only found at the urban sites. Nine of the 14 viruses  
393 were most closely related to viruses found in sewage or faeces. Interestingly, a number of  
394 these viruses are closely related to viruses previously documented in New Zealand. Flumine  
395 genomovirus 11 fell into a clade of five sewage-derived gemycircularviruses, exhibiting 85%  
396 amino acid similarity to its closest match Sewage-associated gemycircularvirus-7a sampled  
397 from a sewage oxidation pond in Christchurch, New Zealand (Kraberger et al. 2015).  
398 Similarly, Flumine genomovirus 8 and 9 share 85% and 86 % amino acid similarity,  
399 respectively, with Sewage associated gemycircularvirus 3 also isolated from a New Zealand  
400 oxidation pond (Kraberger et al. 2015), while Flumine genomovirus 12, 4 and 6 share 87%,  
401 76% and 82% amino acid similarity, respectively, with faeces-associated gemycircularvirus  
402 21 isolated from llama faeces in New Zealand (Steel et al. 2016). Finally, the single

403 *Genomoviridae* virus found in the pristine sites (Flumine genomovirus 1) was most closely  
404 related (81% amino acid similarity) to a virus isolated from minnow tissue in the USA.  
405

### 406 **3.5 Host relationships and patterns of virus diversity**

407 We next characterized each viral family according to their usual assigned host (as identified  
408 in previous studies) and used this to visualize patterns of virus abundance and diversity  
409 (Figure 6). This revealed that the two farming sites had a lower viral abundance across all  
410 host types, while the two pristine sites had a higher abundance of viruses with animal,  
411 plant/fungi (such as the *Astroviridae* and *Tombusviridae*) and unknown hosts. In turn, U1 had  
412 a very high abundance of prokaryote-infecting viruses but a lower abundance of all other  
413 virus types (Figure 6). Virus abundance was highest for those viral families where the host  
414 was unknown, accounting for 2.35% of reads. Plant-infecting viruses were the next-most  
415 abundant (1%), followed by animal-infecting viruses (0.56%). At the family level, we found  
416 a high diversity of plant- and animal-infecting viruses (18 and 17 families, respectively).  
417 There was a surprisingly low abundance and diversity of known prokaryote infecting viruses:  
418 these were the least abundant (0.096%), and the least diverse (six families) group. All sites  
419 had a proportionally high abundance of *Nodaviridae*, *Tombusviridae* and ‘unclassified  
420 *Picornavirales*’ compared to other viral families.

421

### 422 **3.6 Alpha and beta virus diversity**

423 Sites P1 and U2 had the highest richness, manifesting as 38 and 40 virus families,  
424 respectively, while P2 had the lowest at 16 (Table 1). U1 had higher Shannon and Shannon  
425 ENS values than any other site, but only the third highest richness. The two pristine sites had  
426 very different levels of diversity, with P1 having much higher richness (with more than twice

427 the number of viral families), Shannon and Shannon ENS than P2. The two farming sites had  
428 a similar richness, Shannon and Shannon ENS to each other, and the two urban sites were  
429 also similar with respect to richness (with U1 having 20% fewer virus families than U2).

430

431 At the level of virus family, we used principal co-ordinate analysis to examine the differences  
432 between viral communities, examining ‘intra-type’ (i.e., comparing sites with the same land-  
433 use type) and ‘inter-type’ (comparing sites across different land-use types) differences  
434 (Figure 7). Accordingly, the pristine and farming sites had high intra-type similarity and low  
435 inter-type similarity, such that their viral communities were more similar within a land-use  
436 type than to viral communities from different land-use types (Figure 7). The two pristine sites  
437 displayed the most similar viral communities. In contrast, the two urban sites differed  
438 markedly from each other and all other sites and hence had a very different viral community,  
439 both from each other and to that at any other site (i.e., both intra- and inter-type). The urban  
440 site U2 (Palmerston North) was closer to F1 and F2 than to U1, and hence had a viral  
441 community that was more similar to the farming sites than to the other urban site. At the viral  
442 species level, the urban sites had a higher diversity (n=327 species) than the farming (n=150)  
443 and pristine sites (n=119). There were many more viruses shared between the urban and  
444 farming sites (n=76) than between the pristine and farming or urban sites (n=24). Finally,  
445 only eight of 504 species were found in all land-use types, indicative of a relatively high level  
446 of local differentiation.

#### 447 **4. Discussion**

448 Using a mNGS approach we identified a high diversity of novel and highly divergent viruses  
449 in a single New Zealand river system and revealed differences of virome composition in the  
450 river between sampling sites associated with different land-use types. In total, we observed

451 504 putative virus species, of which 491 (97%) were potentially novel and including a new  
452 subfamily within the *Parvoviridae*. Notably, there were considerable differences in the viral  
453 community structure between the land-use types. In particular, the two pristine sites had a  
454 higher abundance of viruses that infect animals, plants and fungi, while at the viral species  
455 level, the urban sites had the highest virome diversity. In addition, there were many more  
456 viruses shared between the urban and farming sites (n=76) than between the pristine and  
457 farming or urban sites (n=24).

458

459 The abiotic environment within the Manawatū River system differed considerably between  
460 sampling sites that had different land-use types, with the pristine sites having lower  
461 measurements of all variables. Total dissolved solids (TDS), salinity, conductivity and  
462 turbidity represent different ways of measuring the presence of dissolved solids and ions in  
463 the water, and generally the lower they are then the higher the water quality (Davies-Colley  
464 2013). Increases in total dissolved solids can adversely affect plants and animals in  
465 freshwater environments due to changes in osmotic conditions, making this an important  
466 indicator of the health of the freshwater ecosystem (Chapman et al. 2000). These measures  
467 are all elevated in effluents, and their presence in freshwater can therefore indicate  
468 contamination from fertilizers, urban run-off, and animal and human waste (Chapman et al.  
469 2000; de Sousa et al. 2014). They can also naturally be elevated due to changes in climate  
470 and differing geology, which impacts the amount of dissolved substance from the weathering  
471 of rocks (Davies-Colley 2013). However, as the sites in this study were all in the same river  
472 catchment and within 50km of each other, the climate and geology are unlikely to be  
473 markedly different. Water temperature was also lower in the pristine sites than in the farming  
474 and urban sites, likely due to the pristine sites being at higher altitude, closer to the Ruahine  
475 Ranges (a source of snow melt), and also the thicker vegetation cover blocking solar

476 radiation. The pristine sites had a pH closer to neutral, which may be related to differences in  
477 dissolved solids from the surrounding soils (Baldisserotto 2011). All these indicators show  
478 that the riverine environment was very different between the pristine and farming/urban sites,  
479 but not substantially different between the farming and urban sites.

480

481 A key observation of our study was the high diversity of viruses in the Manawatū River  
482 system, with an average of 30 virus families detected per site. Indeed, we found a very high  
483 diversity of novel viruses, and only a small number (n=13) described previously, again  
484 indicating that only a tiny fraction of the virosphere has been described to date. Environments  
485 such as freshwater have received relatively little viral metagenomic research, although our  
486 study suggests that they may have highly diverse viromes. In particular, we show that isolated  
487 New Zealand freshwater environments can harbour many novel and highly divergent viruses.  
488 Perhaps of most note, we have identified a novel clade of parvoviruses that was  
489 phylogenetically distinct from other previously described subfamily and genera, and which  
490 may be a new subfamily of the *Parvoviridae*. This may in part reflect New Zealand's  
491 distinctive ecological history, including high levels of endemic species (Walker et al. 2021).  
492 These novel viruses may therefore be naturally present in this water catchment and reflect the  
493 'undisturbed' diversity of the river, rather than the result of human land-use. A high diversity  
494 of bacteria have also been found in New Zealand freshwater (Phiri et al. 2021). Indeed, it is  
495 notable that the pristine sites had the highest abundance of viruses that infect animals, plants  
496 and fungi, and had little overlap (in terms of species shared) with the farming and urban sites  
497 (Figures 6 and 7). This may reflect a higher abundance of native flora and fauna in these  
498 pristine sections of the river that are surrounded by native forest. The two pristine sites had  
499 very different levels of diversity, with P1 having more than twice the number of viral families  
500 than P2, despite P2 having a higher number of viral reads. This may be because the P2 stream

501 was smaller in volume with a smaller catchment, with less opportunity for a high diversity of  
502 terrestrial viruses to enter the river from the surrounding land.

503

504 Virus families that infect fungi, plants and algae were found in particularly high abundance,  
505 with the highest being the *Tombusviridae* associated with plants. This presumably reflects a  
506 high abundance of plant and algae matter in the water, including both aquatic plants living in  
507 the river and terrestrial plants from the surrounding land. However, there was a surprisingly  
508 low abundance and diversity of viruses associated with prokaryotes. This may be because we  
509 filtered out bacteria prior to RNA extraction (using PES membrane filters of 0.2µm pore size)  
510 which would also have removed any lysogenic phages. However, a previous study of urban  
511 streams in Ecuador using a similar filtering system found that prokaryote infecting viruses  
512 had the highest abundance, followed by plant viruses (Guerrero-Latorre et al. 2018).

513 Interestingly, these Ecuadorian streams are known to be contaminated with untreated sewage  
514 (Guerrero-Latorre *et al.* 2018), which may increase bacterial load (and therefore phage  
515 abundance). It is also possible that the high abundance of divergent viruses belonging to  
516 families in which the host is unknown (Figure 6) are in fact phage.

517

518 Metagenomics frequently identifies highly divergent viruses in environmental samples and in  
519 most such studies the host is unknown. We observed a similar pattern. The novel viruses  
520 identified often clustered into clades that fell in basal positions on family-level phylogenies  
521 and were most closely related to viral species found in other metagenomic studies (Zhang et  
522 al. 2018; Starr et al. 2019). As a case in point, many of the *Tombusviridae*-like viruses were  
523 highly divergent and fell into the ‘tombus-like’ virus clade. This is similar to the findings of  
524 Wolf et al. (2020), who identified 199 tombus-like viruses in seawater from the Yangshan  
525 Deep-Water Harbour, Shanghai, China. We also found many divergent viruses from the

526 *Astroviridae* most closely related to viruses found using metagenomics from grassland soil,  
527 California, USA (Starr et al. 2019). As the *Astroviridae* is routinely associated with  
528 vertebrates it is surprising to find these viruses in soil and water. Hence, it is likely that these  
529 were shed from a vertebrate host although this clearly needs to be studied in greater detail.

530

531 As the sampling sites were all from the same river catchment, in some cases the water from  
532 one site would flow to other sampling sites downstream. For example, water from P1 and P2  
533 would flow through F1 and U2. However, there did not appear to be a trend in the number of  
534 reads and number of viral hits when comparing upstream and downstream sites (Figure 3). In  
535 particular, very few viruses (n=17) were found at both the pristine sites and the downstream  
536 farming and urban sites, suggesting that viruses were generally not being carried downstream  
537 for long distances. Notably, for the pristine and farming sites, there was considerably more  
538 overlap in viral community at sites of the same land-use type: P1 and P2 were very similar to  
539 each other, as were F1 and F2 (Figure 7). The exception to this was the urban site U2  
540 (Palmerston North) that was more similar to the two farming sites than to U1 (Feilding). This  
541 difference appears to be driven by the high abundance and diversity of prokaryote infecting  
542 viruses in U1, and the lower abundance of animal- and plant-infecting viruses. Indeed, U1  
543 was on a different tributary of the Manawatū River than the other sites (Figure 1), so the viral  
544 ecology in that part of the river may be different. Feilding (population 17,050) is also a much  
545 smaller urban centre than Palmerston North (population 81,500). In addition, while the  
546 sample sites from both urban sites were downstream of the urban area at the edge of the  
547 town/city, Feilding releases wastewater far downstream in a rural area, whereas Palmerston  
548 North releases wastewater upstream of our sampling site. However, although it might be  
549 expected that the presence of wastewater would increase the abundance of phage, Feilding

550 had the higher phage abundance. Possibly changes in the bacterial diversity/structure in this  
551 urban site have resulted in differences in the phage diversity and structure.  
552  
553 Some novel viruses were found only in the sites adjacent to human land-use (i.e., farming and  
554 urban sites), including all the bastroviruses (*Astroviridae*), all of which were most closely  
555 related to a bastrovirus found in sewage (Dos Anjos et al. 2017). The pattern of  
556 presence/absence in our study and the link to sewage suggests the presence of these viruses  
557 are likely related to human land-use. Similarly, the presence of viruses from the  
558 *Genomoviridae* appears to be related to urban land-use: nine of the 14 viruses were most  
559 closely related to viruses found in sewage or faeces. Despite the generally large differences in  
560 viral community between the two urban sites, they both contained viruses from the  
561 *Genomoviridae*: 13 viral species were identified in U1 and four in U2 (including two viruses  
562 found in both sites), suggesting a link between human land-use and the presence of these  
563 viruses. Notably, however, we did not detect any human viruses. This contrasts with a PCR  
564 study that detected enteric viruses (adenovirus, norovirus, enterovirus, rotavirus, and hepatitis  
565 E virus) in two other rivers in New Zealand (Williamson et al. 2011), which may reflect the  
566 greater sensitivity of PCR assays specifically designed to detect these viruses. In general,  
567 more viruses were found in common between urban and farming sites. For example, 11  
568 *Astroviridae*-like viruses were found in both urban and farming sites, but no *Astroviridae*-like  
569 viruses found in either of the pristine sites were identified in urban or farming sites. Hence,  
570 within viral families at the species level, the farming and urban sites had a more similar viral  
571 community to each other than to the pristine sites, which may be a result of human land-use  
572 adjacent to the river.  
573



574 The only viruses we identified that were previously described were all found in the urban and  
575 farming sites, again indicative of an anthropogenic influence, including agriculture and  
576 introduced species. For example, we identified the Black beetle virus in all farming and urban  
577 sites. The host (*Heteronychus arator*) is a major invasive pasture pest species that was  
578 introduced from Africa in 1930s (Wilson et al. 2016), and the virus was first identified in  
579 1975 in New Zealand (Longworth and Carey 1976). Similarly, at the Palmerston North urban  
580 site (U2) we detected *Rhopalosiphum padi* virus that infects the bird cherry-oat aphid, a pest  
581 of cereal crops that was first recorded in New Zealand in 1921 (Bulman et al. 2005).  
582 Surprisingly, we found Norway luteo-like virus 4 with 96-100% amino acid identity in one  
583 farming and one urban site (F1 and U2), previously associated with the castor bean tick  
584 *Ixodes ricinus* (Pettersson et al. 2017). As this species of tick has not been described in New  
585 Zealand, this result suggest that this virus has a wider host range than is currently known.  
586 Similarly, we identified Pepper mild mottle virus in U2. This virus has previously been  
587 proposed as a water quality indicator and an indicator of the presence of human faeces in  
588 freshwater, as it is the most abundant RNA virus in human faeces but rarely found in animal  
589 faecal matter (Kitajima et al. 2018; Rosario et al. 2009). Our ability to detect these viruses  
590 suggests this technique could be used for ongoing monitoring, including detecting the  
591 presence of pest species in the surrounding area and human-related viruses indicating  
592 contamination of faecal matter in the river. That none of these viruses were found in the  
593 pristine sites suggests these viruses are being introduced into the river from agricultural and  
594 urban run-off, and possibly also discharge of treated wastewater into the river. Indeed, at  
595 pristine sites we would generally expect viruses associated with New Zealand native plants  
596 and animals, most of which are yet to be described.  
597

598 This study represents the first characterization of the virome of a New Zealand river. We  
599 observed a high abundance and diversity of viruses, including many that are both novel and  
600 highly divergent. Within the same river catchment, we identified viruses linked to agriculture  
601 and human presence (including possible links to sewage) in the farming and urban sites that  
602 were not present in the pristine sites. More broadly, this work provides the foundation for  
603 more detailed research on the impacts of human land-use on river viromes which will require  
604 larger sample sizes across multiple river systems. Our results show that human land-use  
605 impacted the viral community in the river, suggesting that further work is needed to reduce  
606 the impact of intensive farming and urbanization on the land and rivers.

## 607 **Acknowledgements**

608 We thank Wendy Kay and Nigel French for their assistance in the field, and Anthony Pita for  
609 assistance with sample processing. We thank Ci-Xiu Li, Wei-Shan Chang, Jackie Mahar and  
610 Sabrina Sadiq for bioinformatics advice. We thank the Molecular Epidemiology and Public  
611 Health Laboratory at Massey University and the Behaviour, Ecology and Evolution Lab at  
612 the University of Sydney for use of their laboratory space. This research utilised the high-  
613 performance computing service, Artemis, provided by the Sydney Informatics Hub, Core  
614 Research Facility, University of Sydney.

## 615 **Funding**

616 This work was supported by an ARC Australian Laureate Fellowship held by ECH  
617 (FL170100022).

618 **Data**

619 Sequence data have been deposited in the Sequence Read Archive (SRA) under accession  
620 numbers SRR17234948-53. The trimmed alignment fasta files used to inder the phylogenetic  
621 trees are available at <https://github.com/RKFrench/Viral-Diversity-NZ-River>.

## 622 5. References

- 623 Alegbeleye, O. O., and Sant'Ana, A. S. (2020) 'Manure-borne pathogens as an important  
624 source of water contamination: An update on the dynamics of pathogen survival/transport as  
625 well as practical risk mitigation strategies', *International Journal of Hygiene and  
626 Environmental Health*, 227: 113524.
- 627 Amvrosieva, T. et al. (2001) 'Viral water contamination as the cause of aseptic meningitis  
628 outbreak in Belarus', *Central European Journal of Public Health* 9: 154-7.
- 629 Baldisserotto, B. (2011) 'Water pH and hardness affect growth of freshwater teleosts',  
630 *Brazilian Journal of Animal Science* 40: 138-44.
- 631 Bolger, A.M., Lohse, M., and Usadel, B. (2014) 'Trimmomatic: a flexible trimmer for  
632 Illumina sequence data', *Bioinformatics* 30: 2114-20.
- 633 Buchfink, B., Reuter, and K., Drost, H.-G. (2021) 'Sensitive protein alignments at tree-of-life  
634 scale using DIAMOND', *Nature Methods* 18: 366-8.
- 635 Bulman, S. et al. (2005) 'Rhopalosiphum aphids in New Zealand. I. RAPD markers reveal  
636 limited variability in lineages of *Rhopalosiphum padi*'. *New Zealand Journal of Zoology* 32:  
637 29-36.
- 638 Burrige, C. P., and Waters, J. M. (2020) 'Does migration promote or inhibit diversification?  
639 A case study involving the dominant radiation of temperate Southern Hemisphere freshwater  
640 fishes', *Evolution* 74: 1954-65.
- 641 Bushnell, B. (2018) 'BBMap short-read aligner, and other bioinformatics tools', University  
642 of California, Berkeley, CA.

- 643 Camacho, C. et al. (2009) 'BLAST+: architecture and applications', *BMC Bioinformatics* 10:  
644 1-9.
- 645 Capella-Gutiérrez, S., Silla-Martínez, J. M., and Gabaldón, T. (2009) 'trimAl: a tool for  
646 automated alignment trimming in large-scale phylogenetic analyses', *Bioinformatics* 25:  
647 1972-3.
- 648 Campbell, S. J. et al. (2020). 'Red fox viromes in urban and rural landscapes', *Virus*  
649 *Evolution* 6: veaa065.
- 650 Chapman, P. M., Bailey, H., and Canaria, E. (2000) 'Toxicity of total dissolved solids  
651 associated with two mine effluents to chironomid larvae and early life stages of rainbow  
652 trout', *Environmental Toxicology and Chemistry* 19: 210-14.
- 653 Chen, J. et al. (2019) 'Detection and characterization of a novel marine birnavirus isolated  
654 from Asian seabass in Singapore', *Virology Journal* 16: 1-10.
- 655 Chen, W. et al. (2018) 'Aquatic bacterial communities associated with land use and  
656 environmental factors in agricultural landscapes using a metabarcoding approach', *Frontiers*  
657 *in Microbiology* 9: 2301.
- 658 Clausen, P. T., Aarestrup, F.M., and Lund, O. (2018) 'Rapid and precise alignment of raw  
659 reads against redundant databases with KMA', *BMC Bioinformatics* 19: 1-8.
- 660 Da Costa, B. et al. (2003) 'Blotched snakehead virus is a new aquatic birnavirus that is  
661 slightly more related to avibirnavirus than to aquabirnavirus' *Journal of Virology* 77: 719-25.
- 662 Davies-Colley, R. J. (2013) 'River water quality in New Zealand: an introduction and  
663 overview', *Ecosystem Services in New Zealand: Conditions and Trends*. Manaaki Whenua  
664 Press, Lincoln: 432-447.

- 665 de Sousa, D. N. R. et al. (2014) 'Electrical conductivity and emerging contaminant as  
666 markers of surface freshwater contamination by wastewater', *Science of the Total*  
667 *Environment* 484: 19-26.
- 668 Department of Conservation (2021a). 'History and culture', [https://www.doc.govt.nz/parks-](https://www.doc.govt.nz/parks-and-recreation/places-to-go/manawatu-whanganui/places/ruahine-forest-park/history-and-culture/)  
669 [and-recreation/places-to-go/manawatu-whanganui/places/ruahine-forest-park/history-and-](https://www.doc.govt.nz/parks-and-recreation/places-to-go/manawatu-whanganui/places/ruahine-forest-park/history-and-culture/)  
670 [culture/](https://www.doc.govt.nz/parks-and-recreation/places-to-go/manawatu-whanganui/places/ruahine-forest-park/history-and-culture/) (Accessed 1st June, 2021).
- 671 Department of Conservation (2021b). 'Nature and conservation',  
672 [https://www.doc.govt.nz/parks-and-recreation/places-to-go/manawatu-](https://www.doc.govt.nz/parks-and-recreation/places-to-go/manawatu-whanganui/places/ruahine-forest-park/nature-and-conservation/)  
673 [whanganui/places/ruahine-forest-park/nature-and-conservation/](https://www.doc.govt.nz/parks-and-recreation/places-to-go/manawatu-whanganui/places/ruahine-forest-park/nature-and-conservation/) (Accessed 1st June, 2021).
- 674 Dos Anjos, K., Nagata, T., and de Melo, F. L. (2017) 'Complete genome sequence of a novel  
675 bastrovirus isolated from raw sewage', *Genome Announcements* 5: e01010-01017.
- 676 Dunn, N. R. et al. (2018) '*Conservation status of New Zealand freshwater fishes, 2017*',  
677 Publishing Team, Department of Conservation.
- 678 Ferguson, C., et al. (2003) 'Fate and transport of surface water pathogens in watersheds'  
679 *Critical Reviews in Environmental Science and Technology* 33: 299-361.
- 680 French, R. K., and Holmes, E. C. (2020) 'An ecosystems perspective on virus evolution and  
681 emergence', *Trends in Microbiology* 28: 165-75.
- 682 Grabherr, M. G. et al. (2011) 'Full-length transcriptome assembly from RNA-Seq data  
683 without a reference genome', *Nature Biotechnology* 29: 644.
- 684 Guerrero-Latorre, L. et al. (2018) 'Quito's virome: Metagenomic analysis of viral diversity in  
685 urban streams of Ecuador's capital city', *Science of the Total Environment* 645: 1334-43.

- 686 Gu, X. et al. (2018) ‘Geospatial distribution of viromes in tropical freshwater ecosystems’,  
687 *Water Research* 137: 220-32.
- 688 Guerrero-Latorre, L. et al (2018) ‘Quito's virome: Metagenomic analysis of viral diversity in  
689 urban streams of Ecuador's capital city’, *Science of the Total Environment* 645: 1334-43.
- 690 Hamill, K. (2012) ‘Effects of Palmerston North City’s Wastewater Treatment Plant discharge  
691 on water quality and aquatic life in the Manawatu River’, Palmerston North City Council and  
692 Horizons Regional Council.
- 693 Hill, M. O. (1973) ‘Diversity and evenness: a unifying notation and its consequences’,  
694 *Ecology* 54: 427-32.
- 695 Jack, S., Bell, D., and Hewitt, J. (2013) ‘Norovirus contamination of a drinking water supply  
696 at a hotel resort’, *New Zealand Medical Journal* 126: 98-107.
- 697 Jones, T. H., et al. (2017) ‘Waterborne viruses and F-specific coliphages in mixed-use  
698 watersheds: microbial associations, host specificities, and affinities with environmental/land  
699 use factors’, *Applied and Environmental Microbiology* 83: e02763-02716.
- 700 Kapelinskaya, T. V., et al. (2011) ‘Expression strategy of densovirus from the  
701 German cockroach, *Blattella germanica*’, *Journal of Virology* 85: 11855-70.
- 702 Katoh, K., and Standley, D. M (2013) ‘MAFFT multiple sequence alignment software  
703 version 7: improvements in performance and usability’, *Molecular Biology and Evolution* 30:  
704 772-80.
- 705 Kirs, M., et al. (2011) ‘Source tracking faecal contamination in an urbanised and a rural  
706 waterway in the Nelson-Tasman region, New Zealand’, *New Zealand Journal of Marine and  
707 Freshwater Research* 45: 43-58.

- 708 Kitajima, M., Sassi, H. P., and Torrey, J. R. (2018) ‘Pepper mild mottle virus as a water  
709 quality indicator’, *NPJ Clean Water* 1: 1-9.
- 710 Kraberger, S., et al. (2015) ‘Characterisation of a diverse range of circular replication-  
711 associated protein encoding DNA viruses recovered from a sewage treatment oxidation  
712 pond’, *Infection, Genetics and Evolution* 31: 73-86.
- 713 Kraberger, S., et al. (2013) ‘Discovery of Sclerotinia sclerotiorum hypovirulence-associated  
714 virus-1 in urban river sediments of Heathcote and Styx Rivers in Christchurch City, New  
715 Zealand’, *Genome Announcements* 1: e00559-00513.
- 716 Krumbholz, A. et al. (2017) ‘Genome sequence of a novel picorna-like RNA virus from feces  
717 of the Antarctic fur seal (*Arctocephalus gazella*)’, *Genome Announcements* 5: e01001-17.
- 718 Lamberto, I. et al. (2014) ‘Mycovirus-like DNA virus sequences from cattle serum and  
719 human brain and serum samples from multiple sclerosis patients’, *Genome Announcements* 2:  
720 e00848-00814.
- 721 Le Lay, C., et al. (2020) ‘Unmapped RNA virus diversity in termites and their symbionts’,  
722 *Viruses* 12: 1145.
- 723 Li, B., and Dewey, C. N. (2011) ‘RSEM: accurate transcript quantification from RNA-Seq  
724 data with or without a reference genome’, *BMC Bioinformatics* 12: 1-16.
- 725 Longworth, J., and Carey, G. (1976) ‘A small RNA virus with a divided genome from  
726 *Heteronychus arator* (F.) [Coleoptera: Scarabaeidae]’, *Journal of General Virology* 33: 31-  
727 40.
- 728 Lukashov, V. V., and Goudsmit, J. 2002. Evolutionary relationships among *Astroviridae*.  
729 *Journal of General Virology* 83: 1397-1405.



- 730 Marcelino, V. R., et al. (2020) ‘CCMetagen: comprehensive and accurate identification of  
731 eukaryotes and prokaryotes in metagenomic data’, *Genome Biology* 21: 1-15.
- 732 Martolia, H. C. S. et al. (2009) ‘An outbreak of hepatitis E tracked to a spring in the foothills  
733 of the Himalayas, India, 2005’, *Indian Journal of Gastroenterology* 28: 99-101.
- 734 Mahar, J. E., et al. (2020) ‘Comparative analysis of RNA virome composition in rabbits and  
735 associated ectoparasites’ *Journal of Virology* 94: e02119-02119.
- 736 McMurdie, P. J., and Holmes, S. (2013) ‘phyloseq: an R package for reproducible interactive  
737 analysis and graphics of microbiome census data’, *PLoS One* 8: e61217.
- 738 Mortimer, N. et al. (2019) ‘Late Cretaceous oceanic plate reorganization and the breakup of  
739 Zealandia and Gondwana’, *Gondwana Research* 65: 31-42.
- 740 Mukherjee, S. S. (2011) ‘*Identification and characterization of tobamo and tombusviruses*  
741 *isolated from New Zealand waters*’, PhD thesis, State University of New York College of  
742 Environmental Science and Forestry.
- 743 Mukherjee, S. S. et al. (2012) ‘New tombusviruses isolated from surface waters in New  
744 Zealand’, *Australasian Plant Pathology* 41: 79-84.
- 745 Nayfach, S. et al. (2021) ‘Metagenomic compendium of 189,680 DNA viruses from the  
746 human gut microbiome’, *Nature Microbiology* 6: 960-70.
- 747 Nguyen, L.-T. et al. (2015) ‘IQ-TREE: a fast and effective stochastic algorithm for estimating  
748 maximum-likelihood phylogenies’ *Molecular Biology and Evolution* 32: 268-74.
- 749 Paradis, E., and Schliep, K. (2019) ‘ape 5.0: an environment for modern phylogenetics and  
750 evolutionary analyses in R’ *Bioinformatics* 35: 526-28.

- 751 Pénzes, J. J. et al. (2020) ‘Reorganizing the family *Parvoviridae*: a revised taxonomy  
752 independent of the canonical approach based on host association’, *Archives of Virology* 165:  
753 2133-2146.
- 754 Pettersson, J. H.-O. et al. (2017) ‘Characterizing the virome of *Ixodes ricinus* ticks from  
755 northern Europe’, *Scientific Reports* 7: 1-7.
- 756 Phiri, B. J. et al. (2020) ‘Does land use affect pathogen presence in New Zealand drinking  
757 water supplies?’, *Water Research* 185: 116229.
- 758 Phiri, B. J. et al (2021) ‘Microbial diversity in water and animal faeces: a metagenomic  
759 analysis to assess public health risk’, *New Zealand Journal of Zoology* 48: 188-201.
- 760 Porter, A. F. et al. (2021) ‘Metagenomic identification of viral sequences in laboratory  
761 reagents’, *Viruses* 13: 2122
- 762 Qiu, H. et al. (2020) ‘Metagenomic analysis revealed that the terrestrial pollutants override  
763 the effects of seasonal variation on microbiome in river sediments’, *Bulletin of*  
764 *Environmental Contamination and Toxicology* 105: 892-8.
- 765 R Core Team. (2021) ‘R: A language and environment for statistical computing’, R  
766 Foundation for Statistical Computing, Vienna, Austria.
- 767 Reuter, G. et al. (2015) ‘A highly divergent picornavirus in an amphibian, the smooth newt  
768 (*Lissotriton vulgaris*)’. *Journal of General Virology* 96: 2607–13.
- 769 Rice, P., Longden, I., and Bleasby, A. (2000) ‘EMBOSS: the European molecular biology  
770 open software suite’, *Trends in Genetics* 16: 276-7.
- 771 Riviere, C., and Rochon, D. (1990) ‘Nucleotide sequence and genomic organization of melon  
772 necrotic spot virus’, *Journal of General Virology* 71: 1887-96.

- 773 Roossinck, M. J. (2015) 'Plants, viruses and the environment: ecology and mutualism',  
774 *Virology* 479: 271-7.
- 775 Rosario, K. et al. (2009) 'Pepper mild mottle virus as an indicator of fecal pollution', *Applied*  
776 *and Environmental Microbiology* 75: 7261-7.
- 777 Roygard, J., McArthur, K., and Clark, M. (2012) 'Diffuse contributions dominate over point  
778 sources of soluble nutrients in two sub-catchments of the Manawatu River, New Zealand'  
779 *New Zealand Journal of Marine and Freshwater Research* 46: 219-41.
- 780 Sedyaningsih-Mamahit, E. et al. (2002) 'First documented outbreak of hepatitis E virus  
781 transmission in Java, Indonesia', *Transactions of the Royal Society of Tropical Medicine and*  
782 *Hygiene* 96: 398-404.
- 783 Sekwadi, P. et al. (2018) 'Waterborne outbreak of gastroenteritis on the KwaZulu-natal coast,  
784 South Africa, December 2016/January 2017', *Epidemiology and Infection* 146: 1318-25.
- 785 Sit, T. L., and Lommel, S. A. (2015) '*Tombusviridae*' *eLS*: 1-9.
- 786 Skotnicki, M. et al. (1993) 'The genomic sequence of cardamine chlorotic fleck carmovirus',  
787 *Journal of General Virology* 74: 1933-7.
- 788 Sommers, P. et al. (2021) 'Integrating viral metagenomics into an ecological framework',  
789 *Annual Review of Virology* 8: 133-58.
- 790 Starr, E. P. et al. (2019) 'Metatranscriptomic reconstruction reveals RNA viruses with the  
791 potential to shape carbon cycling in soil', *Proceedings of the National Academy of Sciences*  
792 *USA* 116: 25900-8.

- 793 Steel, O. et al. (2016) ‘Circular replication-associated protein encoding DNA viruses  
794 identified in the faecal matter of various animals in New Zealand’, *Infection, Genetics and*  
795 *Evolution* 43: 151-64.
- 796 Thao, M. L. et al. (2001) ‘Genetic characterization of a putative Densovirus from the  
797 mealybug *Planococcus citri*’, *Current Microbiology* 43: 457-458.
- 798 Valles, S. et al. (2017) ‘ICTV virus taxonomy profile: *Dicistroviridae*’, *Journal of General*  
799 *Virology* 98: 355-6.
- 800 Van Rossum, T. et al. (2015) ‘Year-long metagenomic study of river microbiomes across  
801 land use and water quality’, *Frontiers in Microbiology* 6: 1405.
- 802 Varsani, A., and Krupovic, M. (2021) ‘Family *Genomoviridae*: 2021 taxonomy update’,  
803 *Archives of Virology* 166: 2911–26
- 804 Waldron, F.M., Stone, G. N., and Obbard, D. J. (2018) ‘Metagenomic sequencing suggests a  
805 diversity of RNA interference-like responses to viruses across multicellular eukaryotes’,  
806 *PLoS Genetics* 14: e1007533.
- 807 Walker, S., Monks, A. and Innes, J. G (2021) ‘Life history traits explain vulnerability of  
808 endemic forest birds and predict recovery after predator suppression’, *New Zealand Journal*  
809 *of Ecology* 45: 3447.
- 810 Wickham, H. (2016) ‘ggplot2: Elegant Graphics for Data Analysis’, Springer-Verlag New  
811 York.
- 812 Wilkinson, L. (2011) ‘venneuler: Venn and Euler Diagrams’, R package version 1.1-0.  
813 Available at <http://CRAN.R-project.org/package=venneuler>.

- 814 Wille, M. et al. (2020) ‘Sustained RNA virome diversity in Antarctic penguins and their  
815 ticks’, *The ISME Journal* 14: 1768-82.
- 816 Wille, M. et al. (2021) ‘RNA virome abundance and diversity is associated with host age in a  
817 bird species’, *Virology* 561: 98-106.
- 818 Williamson, W. et al. (2011) ‘Enteric viruses in New Zealand drinking-water sources’ *Water  
819 Science and Technology* 63: 1744-51.
- 820 Wilson, M. J. et al. (2016) ‘Developing a strategy for using entomopathogenic nematodes to  
821 control the African black beetle (*Heteronychus arator*) in New Zealand pastures and  
822 investigating temperature constraints’, *Biological Control* 93: 1-7.
- 823 Wolf, Y. I. et al. (2020) ‘Doubling of the known set of RNA viruses by metagenomic analysis  
824 of an aquatic virome’, *Nature Microbiology* 5: 1262-70.
- 825 Yu, G. (2020) ‘Using ggtree to visualize data on tree-like structures’, *Current Protocols in  
826 Bioinformatics* 69: e96.
- 827 Zhang, Y.-Z., Shi, M., and Holmes, E. C. (2018) ‘Using metagenomics to characterize an  
828 expanding virosphere’, *Cell* 172: 1168-72.

829 **Figure legends**

830

831 **Figure 1.** Map of the Manawatū River catchment in blue and the six sampling sites as  
832 coloured circles, with the inset showing the river catchment location on the North Island of  
833 New Zealand as a red square. P1 and P2 are ‘pristine’ sites having only flowed through native  
834 bush (seen as dark green areas on the satellite image). F1 and F2 are ‘farming’ sites flowing  
835 through intensive agricultural land (light green on the satellite image). U1 and U2 are ‘urban’  
836 sites, flowing through two urban areas – Feilding and Palmerston North (grey on the satellite  
837 image). The water flows from the east and south towards the sea on the west coast, as  
838 indicated by the white arrows. Satellite image created using Google Earth.

839

840 **Figure 2.** Measurements of salinity, pH, total dissolved solids, turbidity, conductivity and  
841 temperature at the six different sites on the Manawatū River, grouped into the different site  
842 types (pristine, farming and urban). For all measurements except temperature there are three  
843 values per sampling site which have been jittered to reduce overplotting.

844

845 **Figure 3.** Read counts and the percentage of viral reads (%) for libraries from six sites on the  
846 Manawatū River.

847

848 **Figure 4.** Phylogeny of the *Astroviridae* based on the non-structural polyprotein sequence  
849 (alignment length of 733 amino acids). Viruses obtained in this study are shown in blue and  
850 have a '+' after their name. Related viruses are shown in black. Virus abundance is expressed  
851 as the percentage of the total number of reads and represented by the size of each coloured  
852 symbol. The colour of each symbol refers to the site type. Black circles on nodes show

853 bootstrap support values greater than 90%. Branches are scaled according to the number of  
854 amino acid substitutions per site, shown in the scale bar. The tree is midpoint rooted.

855

856 **Figure 5.** Phylogeny of the *Parvoviridae* based on the non-structural protein sequence  
857 (alignment length of 452 amino acids). Viruses obtained in this study are shown in blue and  
858 have a '+' after their name. Related viruses are in black. Virus abundance is expressed as the  
859 percentage of the total number of reads and represented by the size of each coloured symbol.  
860 The colour of each symbol refers to the site type. Black circles on nodes show bootstrap  
861 support greater than 90%. Branches are scaled according to the number of amino acid  
862 substitutions per site, shown in the scale bar. The tree is midpoint rooted.

863

864 **Figure 6.** Virus abundance (as a percentage of the total number of reads) of viral families  
865 from each site on the Manawatū River. Virus families are divided into each panel depending  
866 on their usual host - animal, plant/fungi, prokaryote and unknown. Unclassified viruses did  
867 not have a classification according to the current NCBI taxonomy.

868

869 **Figure 7.** Viral community similarities and differences at the taxonomic family level (left)  
870 and species level (right). Left - A Principal Coordinates Analysis (PCoA) applying the Bray–  
871 Curtis dissimilarity matrix for viral abundance and virus family diversity, showing the  
872 relative similarity/differences in viral community between sites with differing land-use types  
873 – pristine (green), farming (orange), and urban (red). Points closer to one another are more  
874 similar in virome structure than those further away. Right – a Venn diagram showing the  
875 number of virus species shared between the three land-use types (with an amino acid  
876 similarity >95%).

877 **Table 1.** The richness, Shannon, and Shannon effective number of species (ENS) values for  
878 each site on the Manawatū River. These were calculated at a family level and include  
879 unclassified virus groups such as ‘unclassified Riboviria’.

|    | Richness | Shannon | Shannon ENS |
|----|----------|---------|-------------|
| P1 | 38       | 2.13    | 8.39        |
| P2 | 16       | 1.88    | 6.54        |
| F1 | 28       | 2.21    | 9.07        |
| F2 | 24       | 2.11    | 8.28        |
| U1 | 32       | 2.52    | 12.45       |
| U2 | 40       | 2.00    | 7.39        |

880



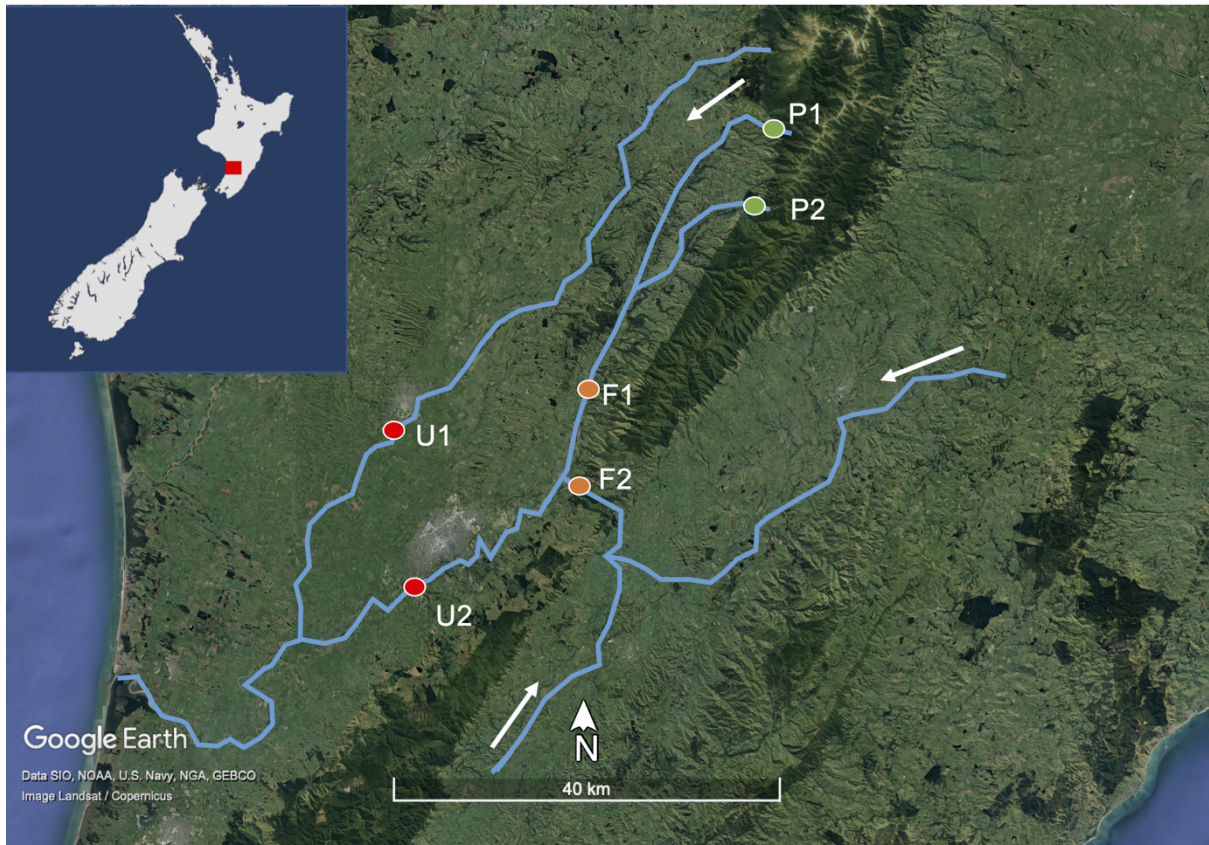

881

882 **Figure 1**

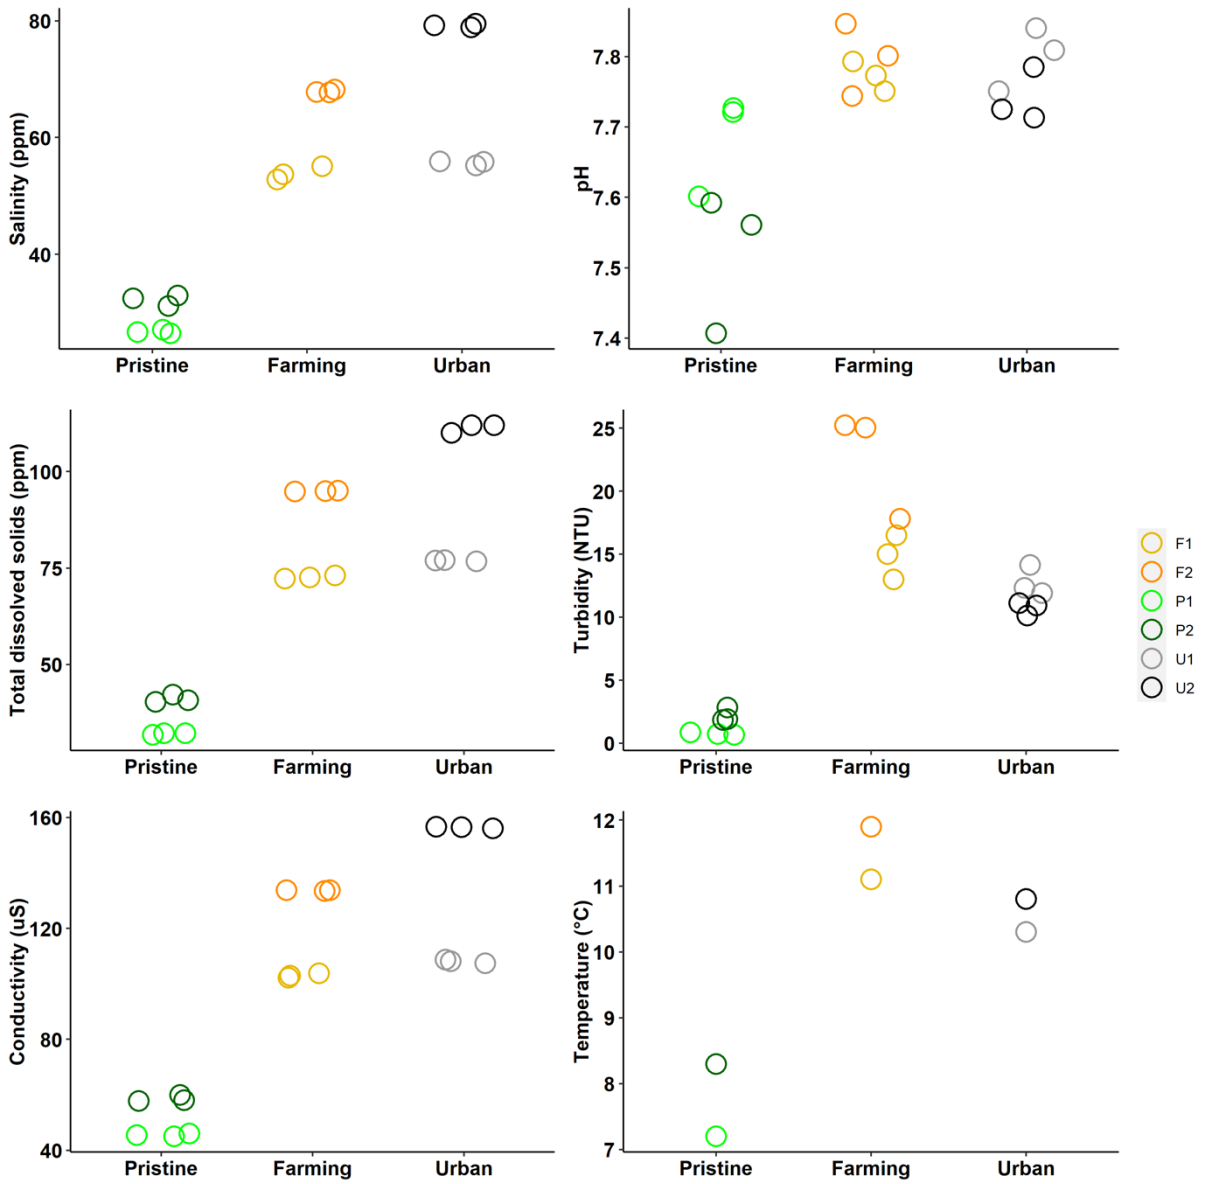

883

884 **Figure 2**

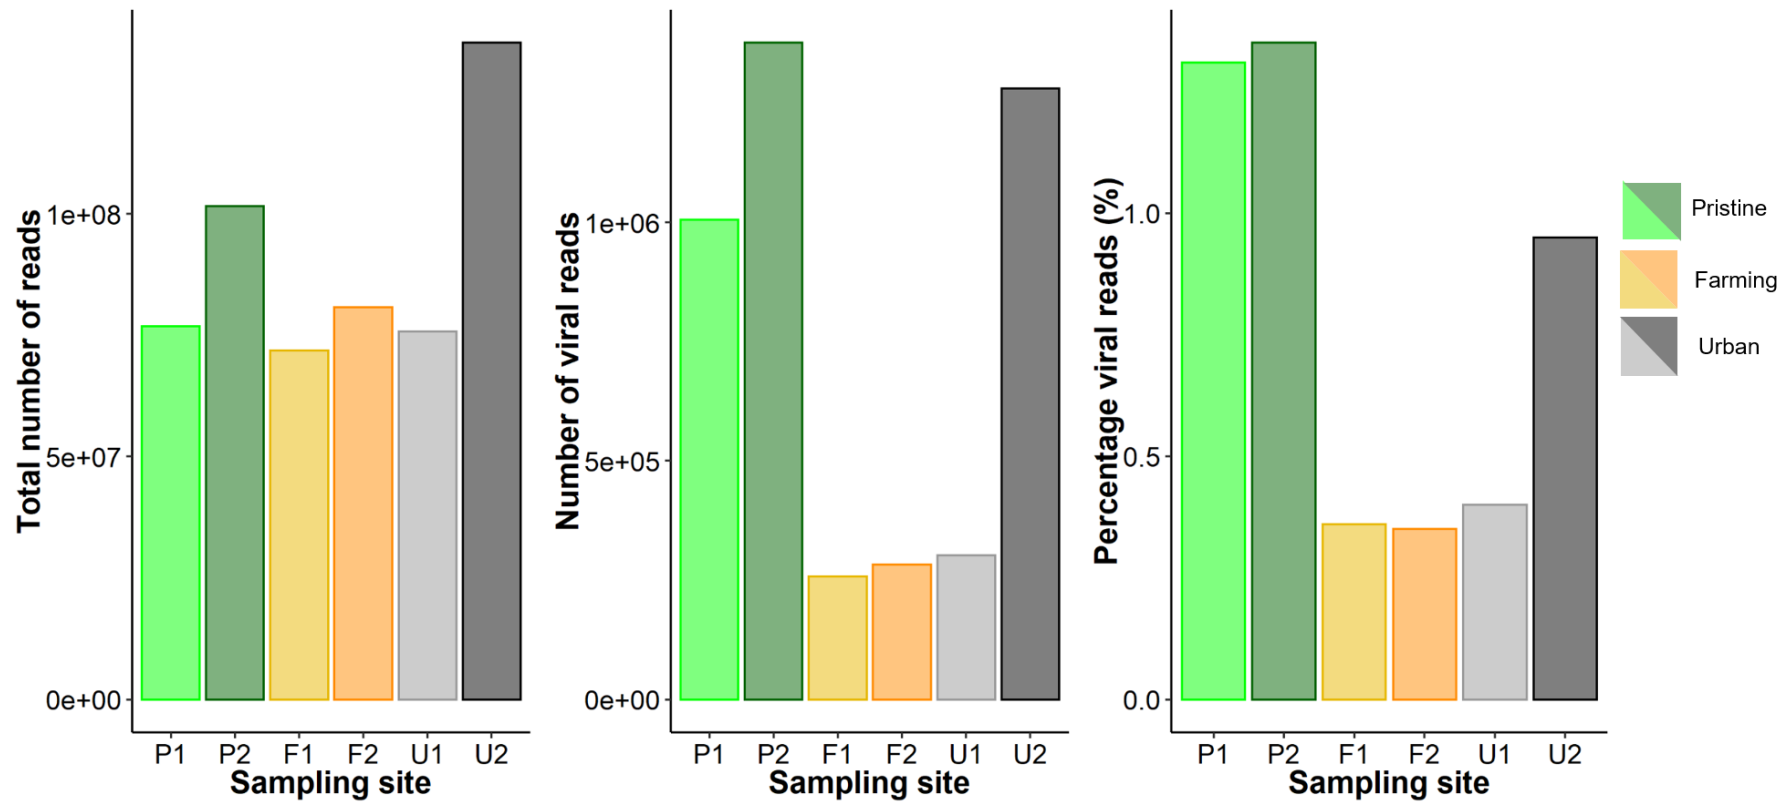

885

886 **Figure 3**

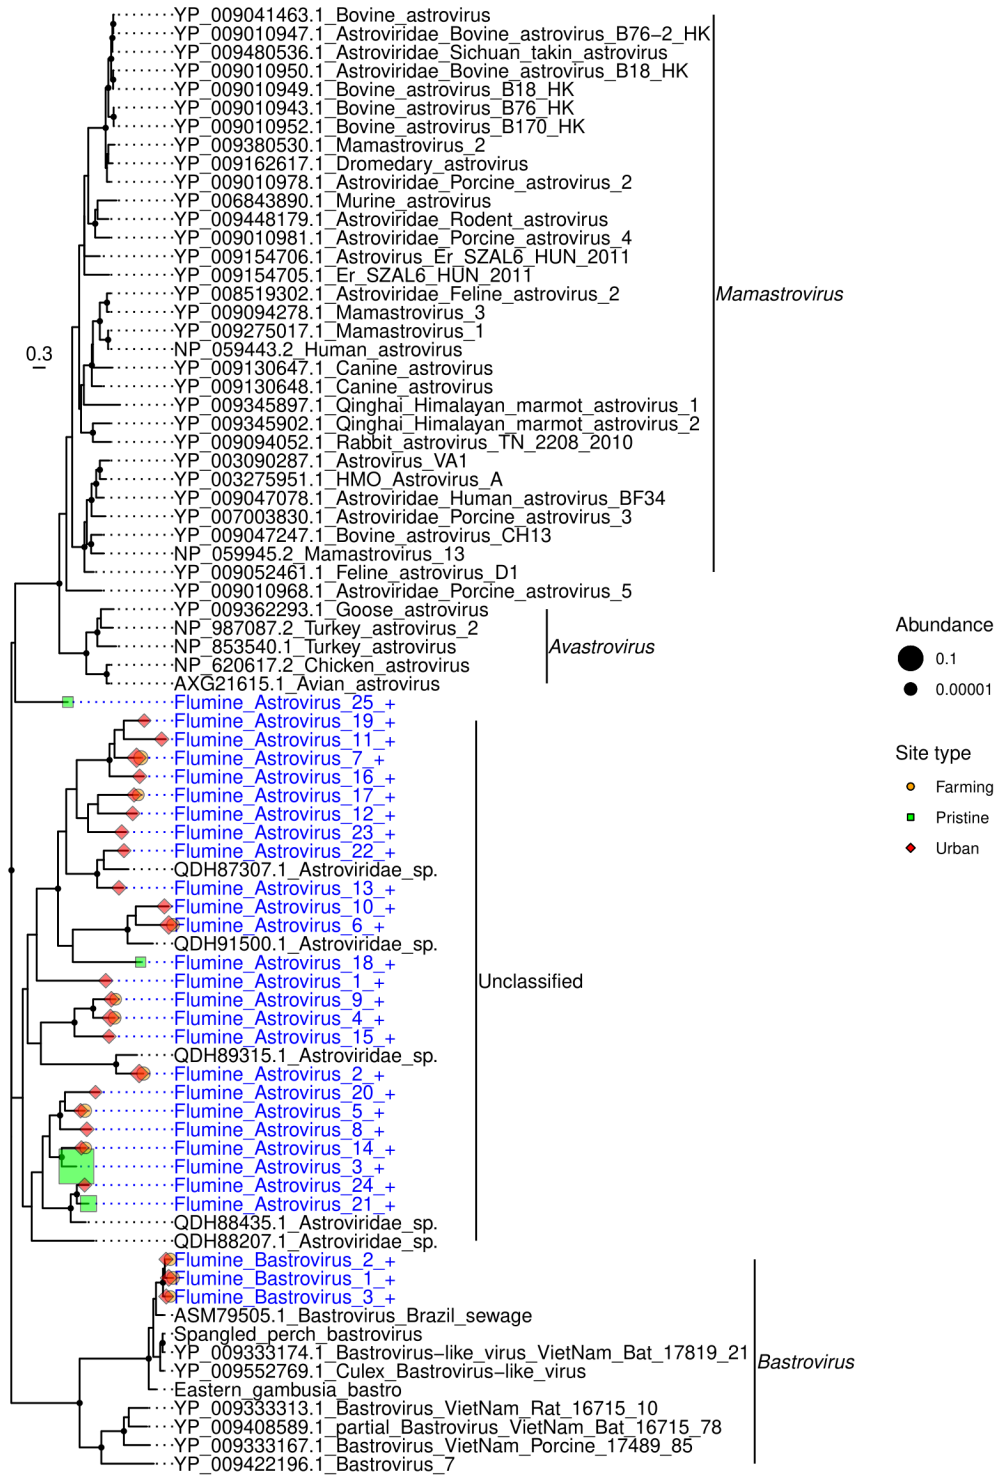

887

888 **Figure 4**

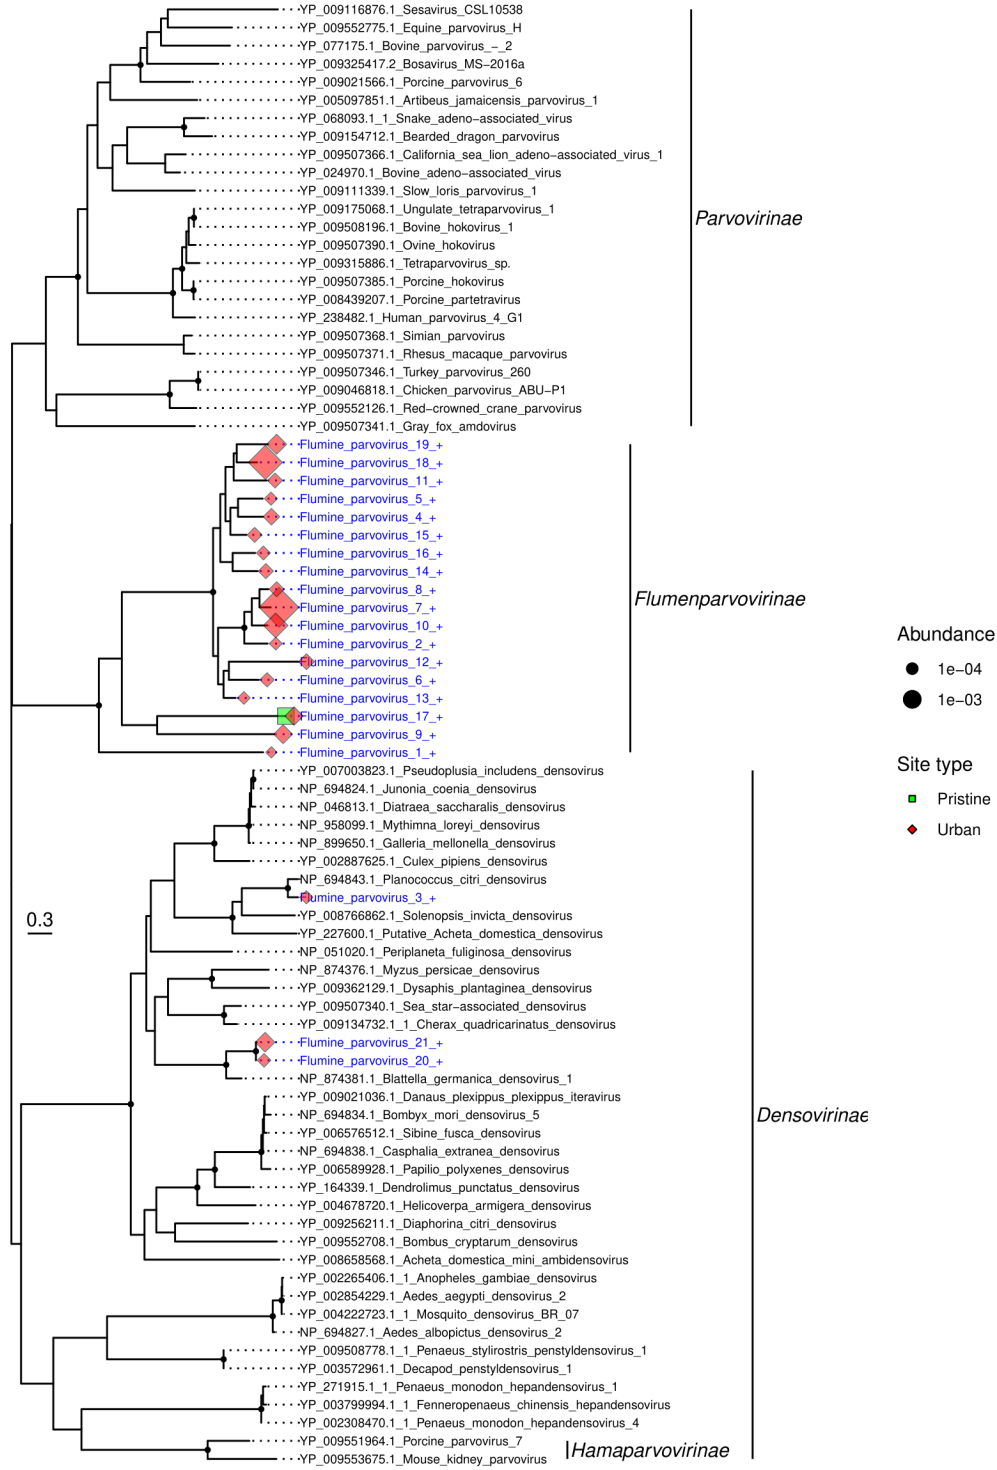

889

890 **Figure 5**

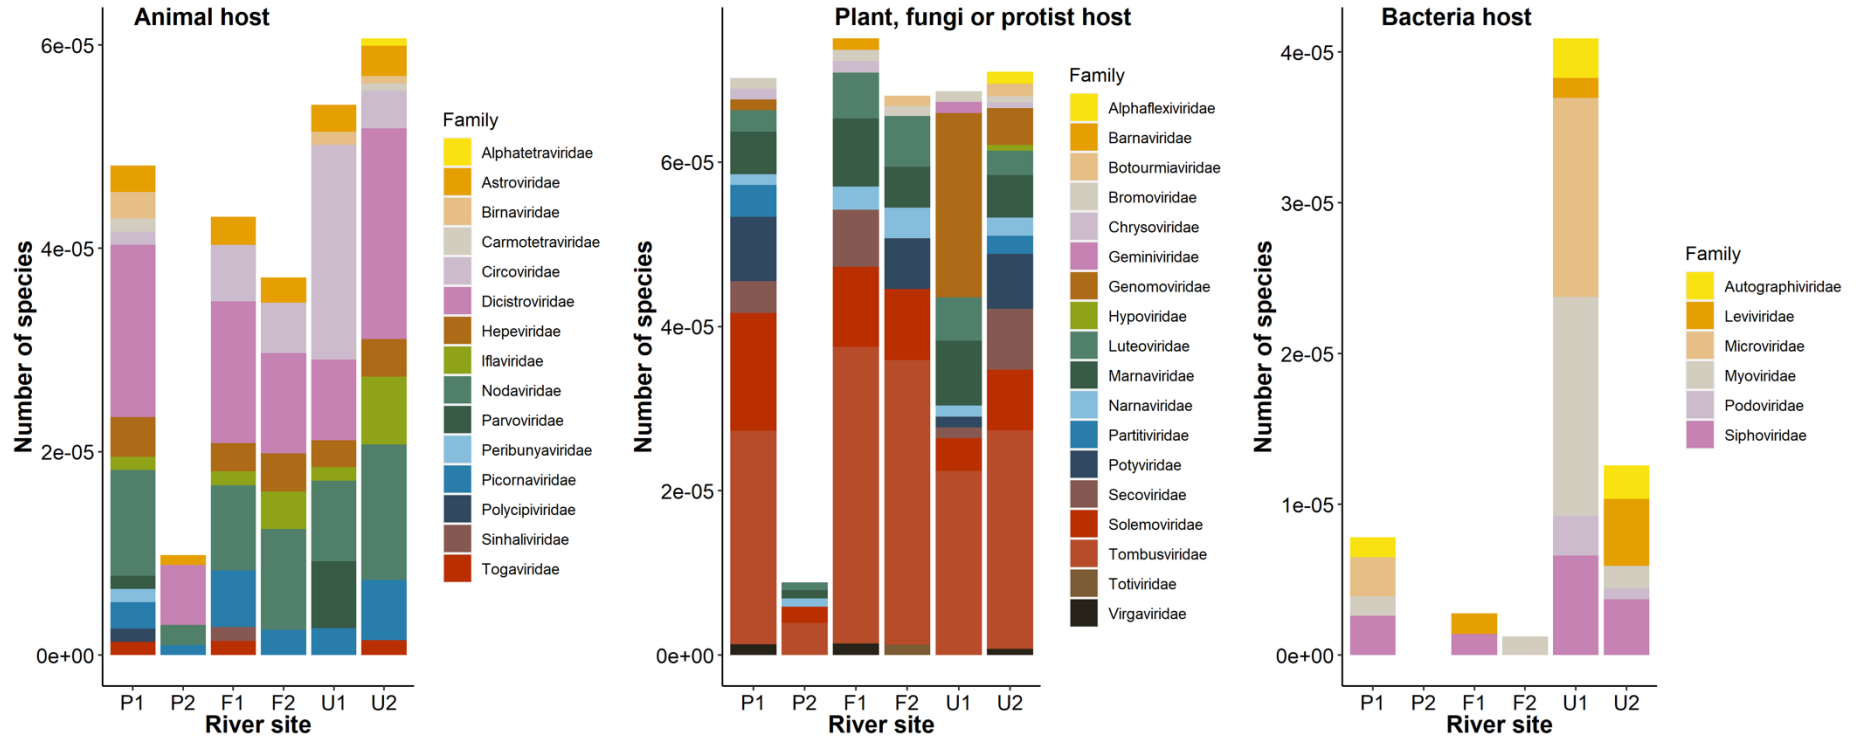

891

892 **Figure 6**

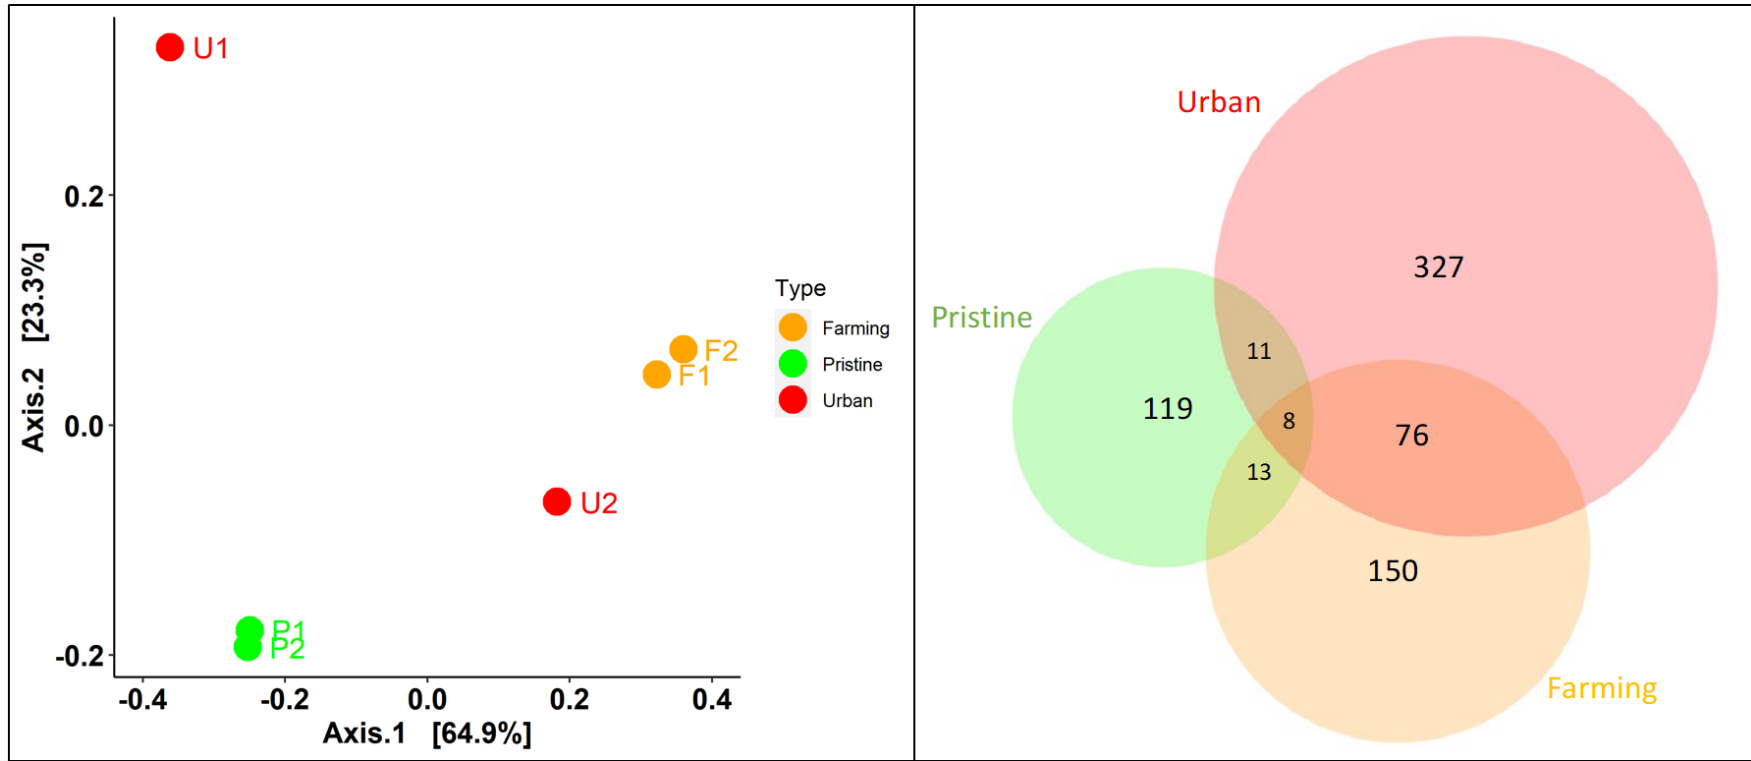

893

894 **Figure 7**
